# Supplementary material
Source: publisher figshare collection journal article supplement (https://acs.figshare.com/ndownloader/files/11500370)
Supplement: Supplementary file 1 [file 11500370]

## Supporting Information

### Highly Stable $\text{K}_2\text{SiF}_6\text{:Mn}^{4+}\text{@K}_2\text{SiF}_6$ Composite Phosphor with Narrow Red Emission for White LEDs

Lin Huang <sup>a</sup>, Yong Liu <sup>a</sup>, Jinbo Yu <sup>a</sup>, Yiwen Zhu <sup>b</sup>, Fengjuan Pan <sup>c</sup>, Tongtong Xuan <sup>a</sup>, Mikhail G. Brik <sup>d, e, f</sup>, Chengxin Wang <sup>a</sup>, Jing Wang <sup>\*, a</sup>

<sup>a</sup> Ministry of Education Key Laboratory of Bioinorganic and Synthetic Chemistry, State Key Laboratory of Optoelectronic Materials and Technologies, School of Chemistry, School of Materials Science and Engineering, Sun Yat-Sen University, Guangzhou, 510275, P. R. China.

<sup>b</sup> College of Materials & Environmental Engineering, Hangzhou Dianzi University, Hangzhou, 310018, P. R. China.

<sup>c</sup> Beijing National Laboratory for Molecular Science (BNLMS), State Key Laboratory of Rare Earth Materials Chemistry and Applications, College of Chemistry and Molecular Engineering, Peking University, Beijing, 100871, P. R. China.

<sup>d</sup> College of Science, Chongqing University of Posts and Telecommunications, Chongqing, 400065, P. R. China.

<sup>e</sup> Institute of Physics, University of Tartu, W. Ostwald Street 1, Tartu, 50411, Estonia.

<sup>f</sup> Institute of Physics, Jan Długosz University, Armii Krajowej 13/15, PL-42200 Częstochowa, Poland.

\* E-mail: ceswj@mail.sysu.edu.cn, Tel: +86-20-84112112, Fax: +86-20-84111038.

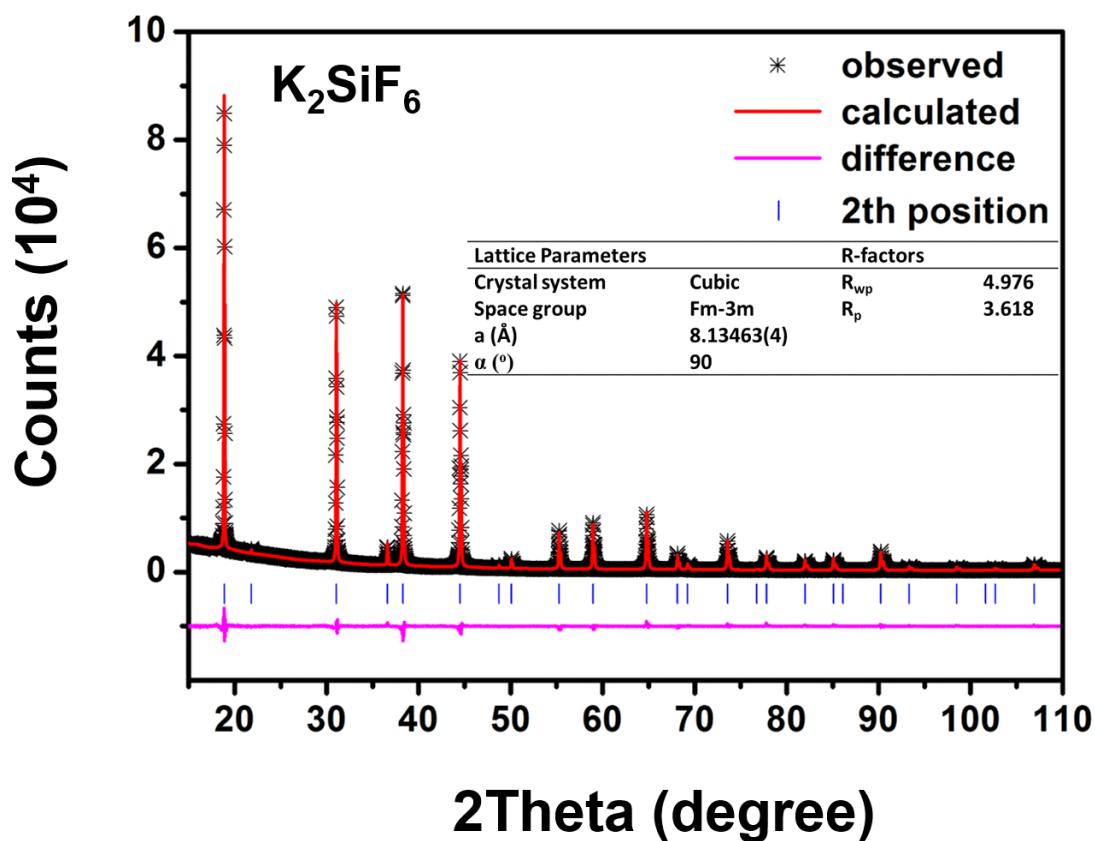

**Figure S1** XRD refinement results of as-prepared K<sub>2</sub>SiF<sub>6</sub> matrix.

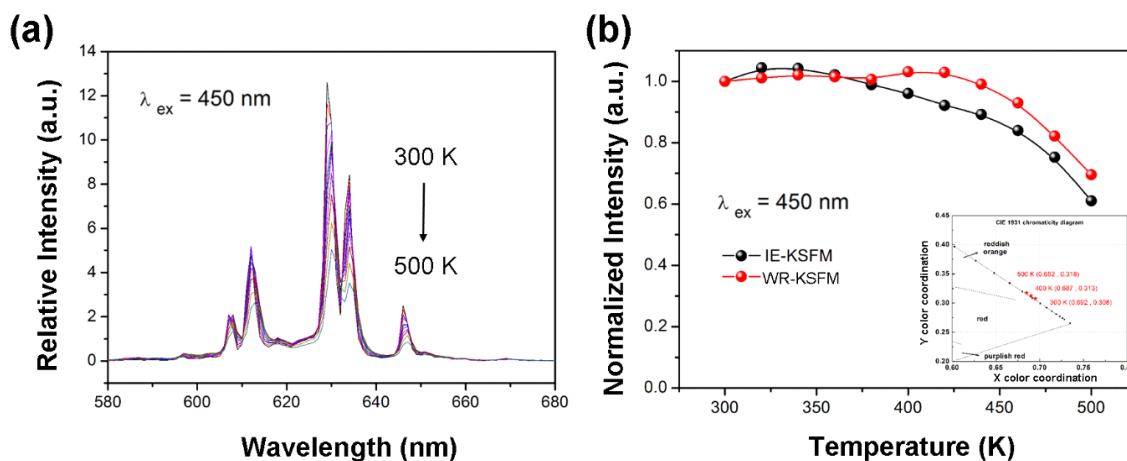

**Figure S2** (a) PL spectra of WR-KSFM-8 and (b) thermal quenching curves of WR-KSFM and IE-KSFM at the temperature range from 300-500 K. The inset of (b) shows the CIE color coordinates.

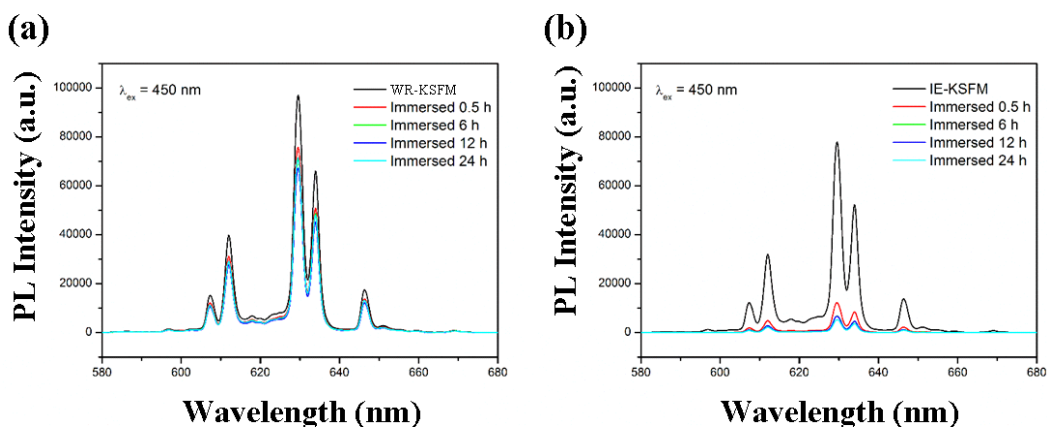

**Figure S3** PL spectra of (a) WR-KSFM-8 and (b) IE-KSFM samples after immersion in water for different time.

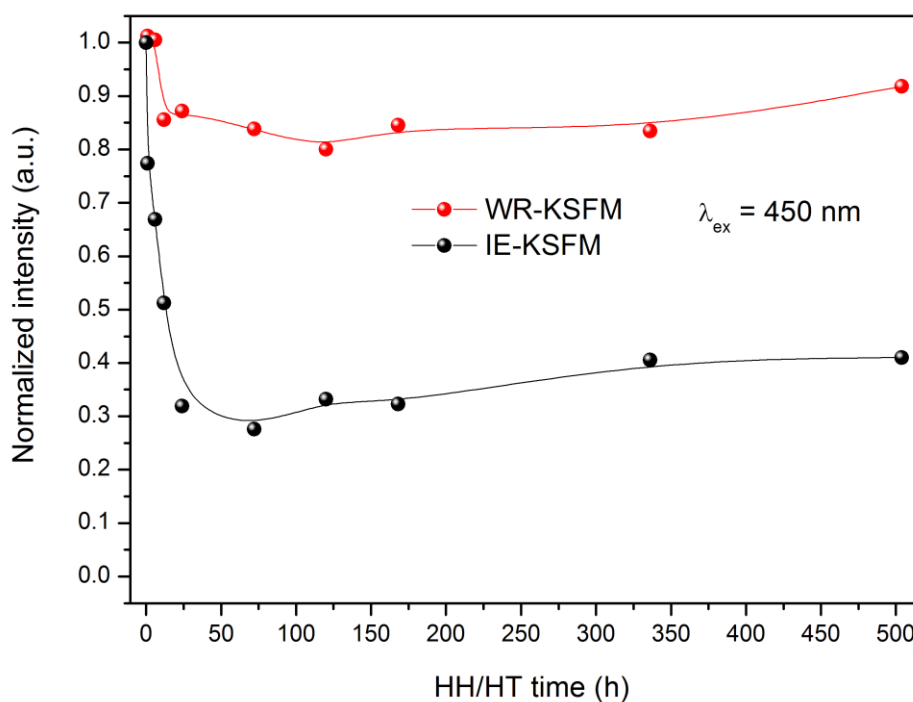

**Figure S4** The emission intensity of WR-KSFM (red line) and IE-KSFM (black line) after being aging under HH and HT conditions for t hours ( $t = 0 \sim 504$ ; normalized at  $t = 0$ ).

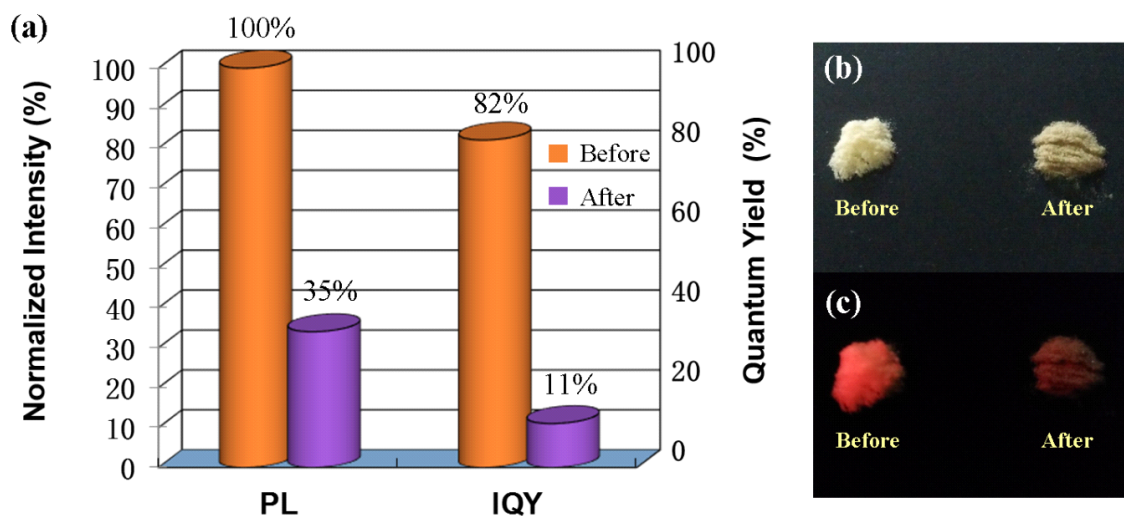

**Figure S5** (a) The emission intensity and inner quantum yield and photographs (b and c under natural light and 365-nm UV-lamp, respectively) of CO-KSFM before and after 6 h immersion in water.

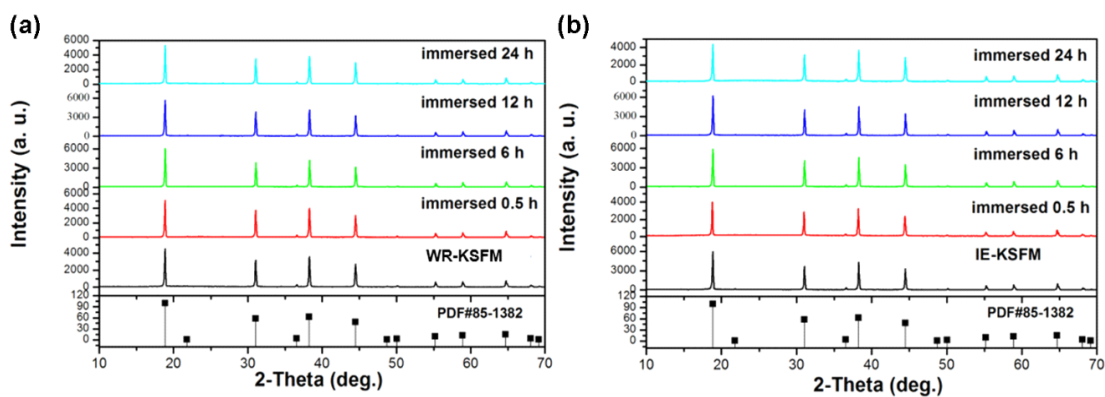

**Figure S6** XRD patterns of (a) WR-KSFM and (b) IE-KSFM before and after t h immersion in water (t=0.5, 6, 12 and 24).

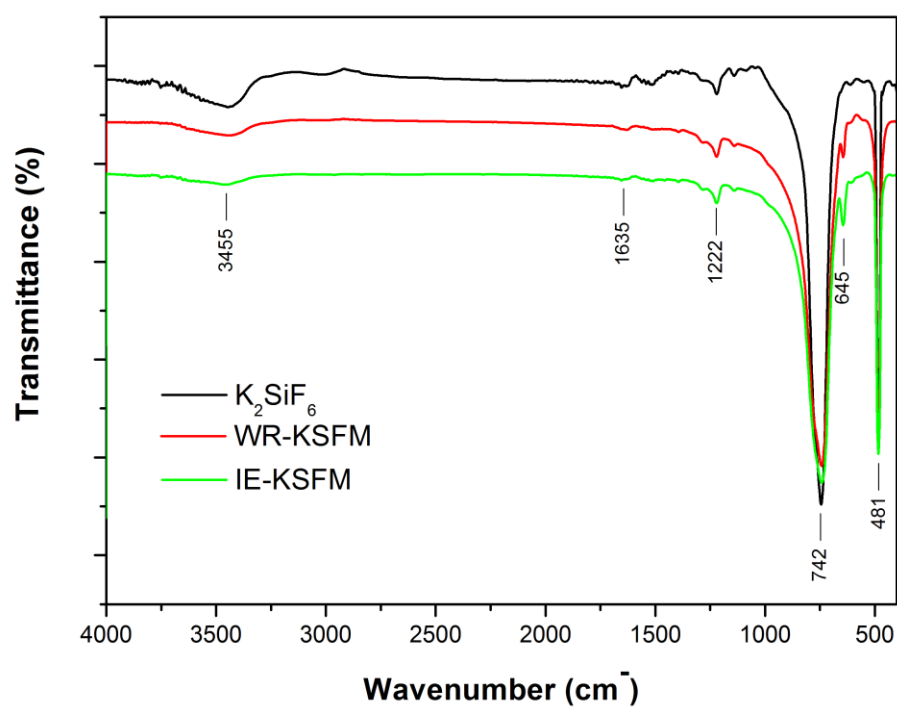

**Figure S7** FT-IR spectra of the WR-KEFM (red line), IE-KSFM (green line) and K<sub>2</sub>SiF<sub>6</sub> (black line).

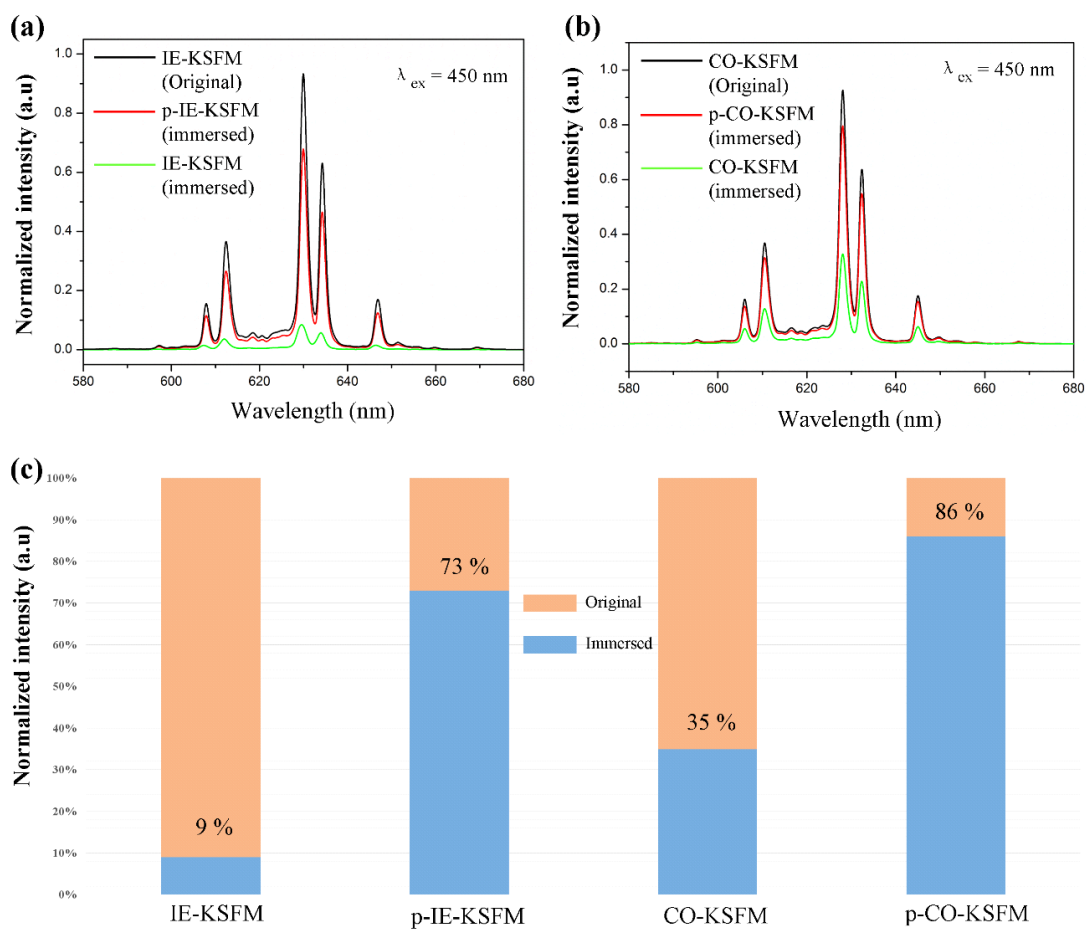

**Figure S8** (a, b) PL spectra and (c) the emission intensity of IE-KSFM/p-IE-KSFM and CO-KSFM/p-CO-KSFM before and after 6 hours immersion.

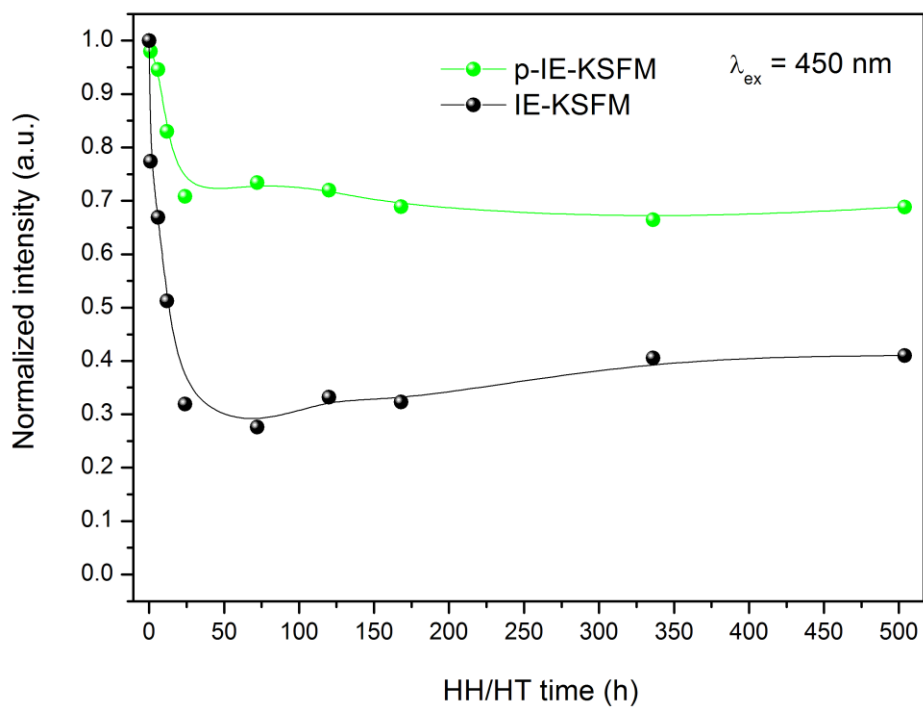

**Figure S9** The emission intensity of p-IE-KSFM (green line) and IE-KSFM (black line) after being aging under HH and HT conditions for  $t$  hours ( $t=0 \sim 504$ ; normalized at  $t=0$ ).

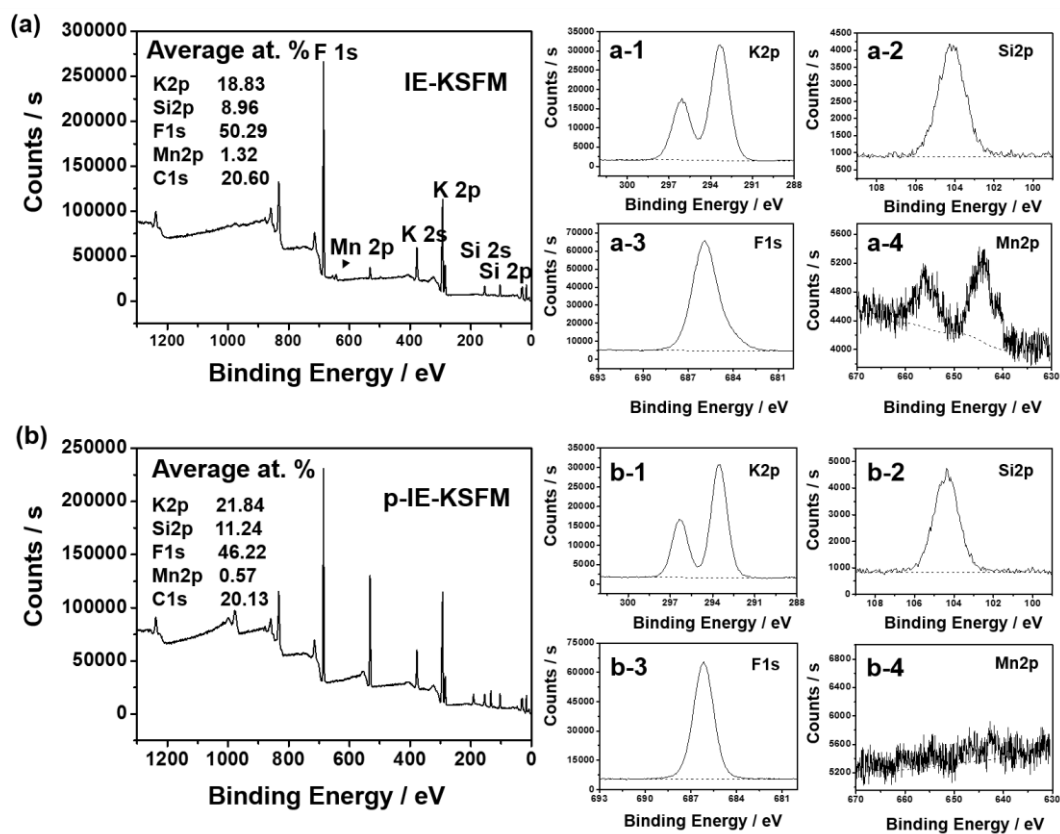

**Figure S10** XPS spectra of (a) IE-KSFM, (b) p-IE-KSFM and high-resolution XPS of K2p, Si2p, F1s and Mn2p in (a) and (b).
